# Supplementary material
Source: MDPI journal article supplement (https://www.mdpi.com/2073-4433/14/11/1693)
Supplement: s1 [file s1]

## Supplementary Materials:

Olalekan A. M. Popoola <sup>1,\*</sup>, Rose Alani <sup>2</sup>, Felix Assah <sup>3</sup>, Taibat Lawanson <sup>4</sup>, Awah K. Tchouaffi <sup>3,5</sup>, Clarisse Mapa-Tassou <sup>6</sup>, Nfondoh Blanche <sup>3,5</sup>, Damilola Odekunle <sup>4</sup>, Richard Unuigboje <sup>4</sup>, Victor A. Onifade <sup>4</sup>, Toluwalope Ogunro <sup>4</sup>, Meelan Thondoo <sup>7</sup>, Roderic L. Jones <sup>1</sup> and Tolu Oni <sup>7</sup>

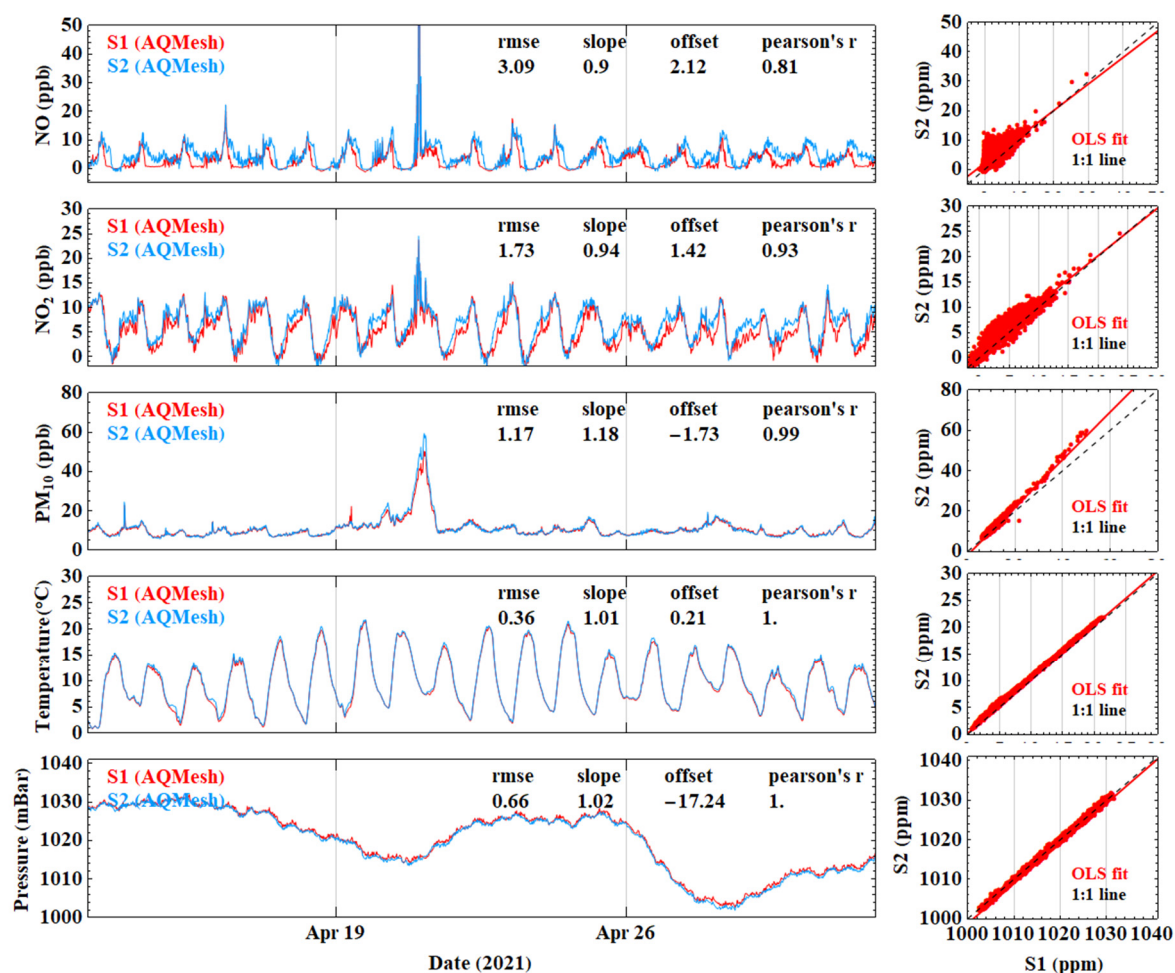

**Figure S1.** Time series and scatter plots of NO, NO<sub>2</sub>, PM<sub>10</sub>, temperature and pressure for the two AQMesh nodes during the co-location trial at the urban background station in Cambridge, UK. Statistics shown inset in the time series are for S1 relative to S2.

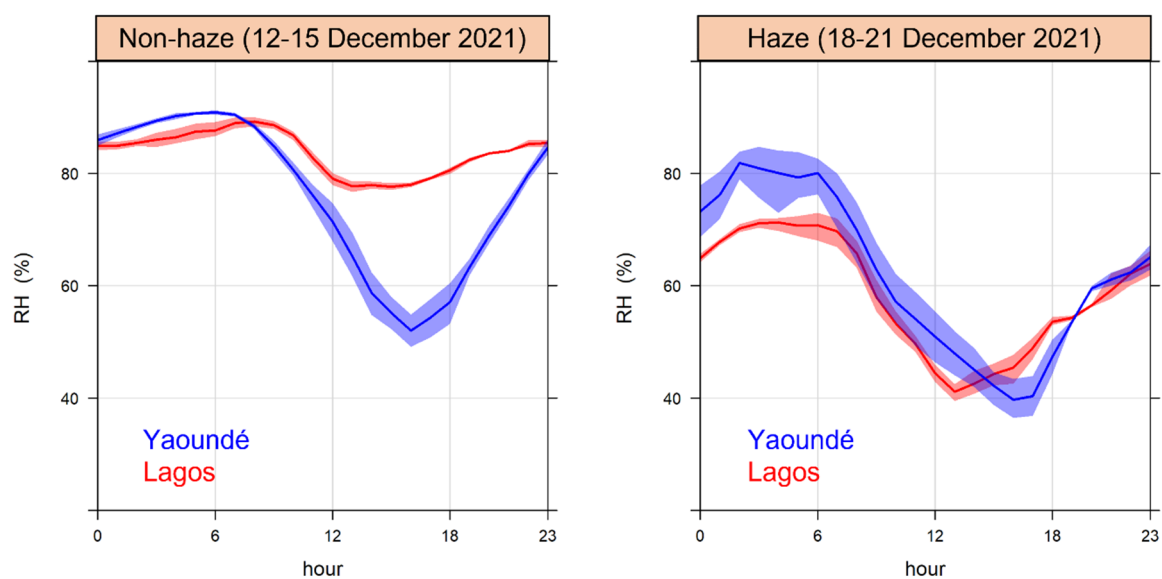

**Figure S2.** Diel profiles at AW-VI, Lagos and MM-F, Yaoundé for a 4-day period during haze and non-haze episodes.

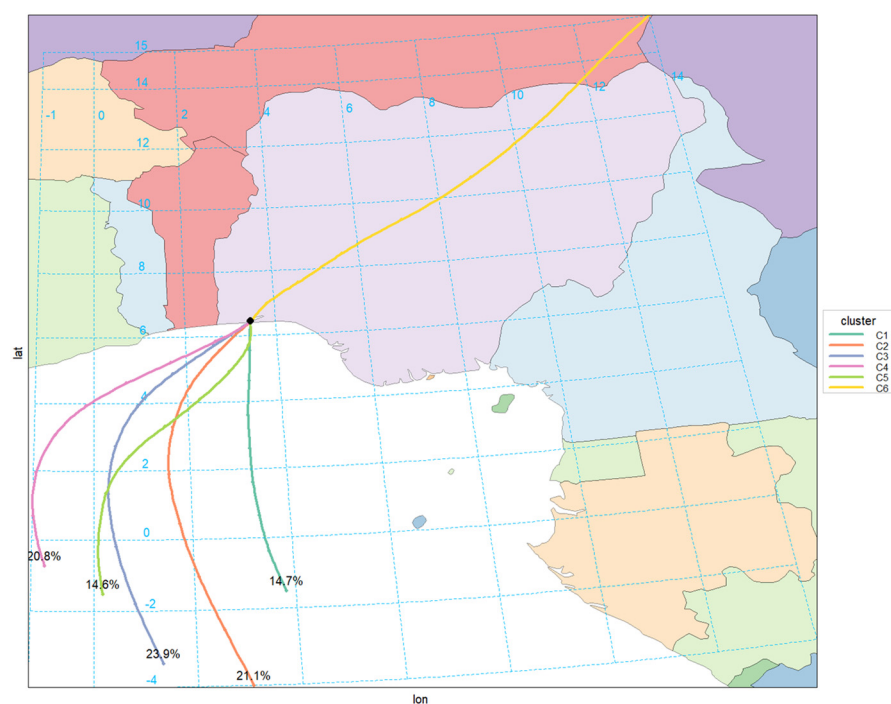

**Figure S3.** Map showing the 6-cluster solution to back trajectories for AW-VI, Lagos, Nigeria (pink bordered area) for the duration of the campaign (2021-2022). The number represents the percentage mean for each cluster relative to the overall trajectory.

(a)

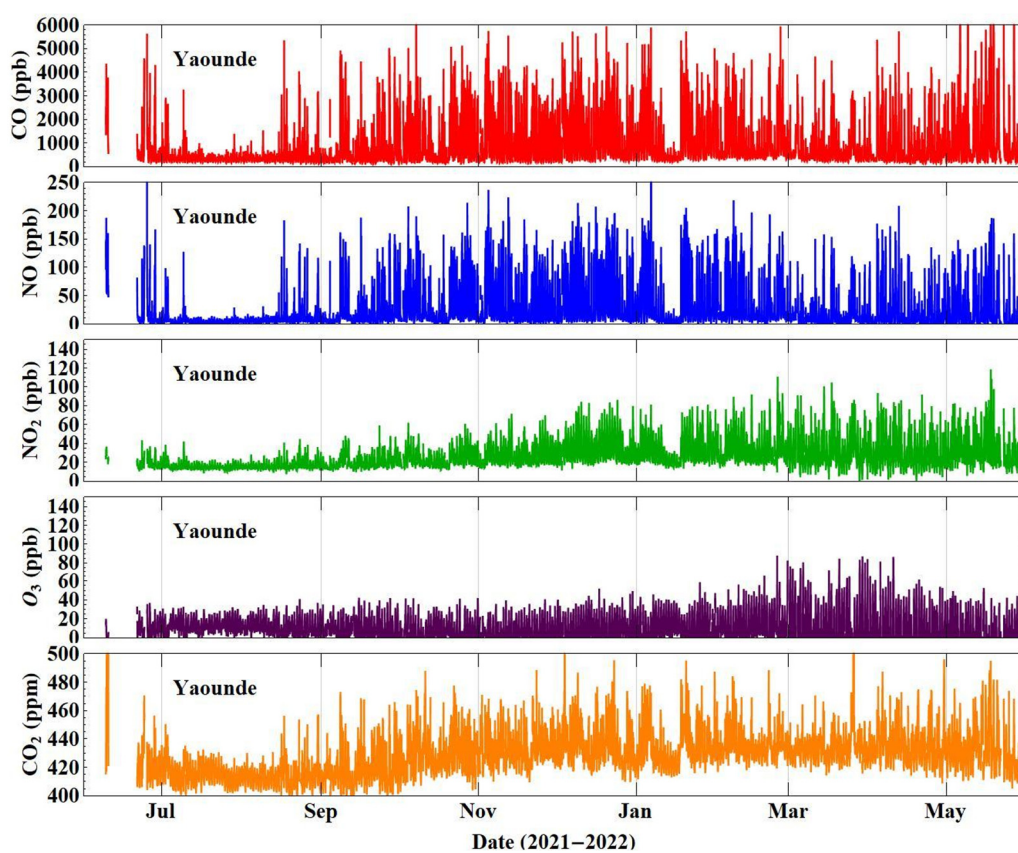

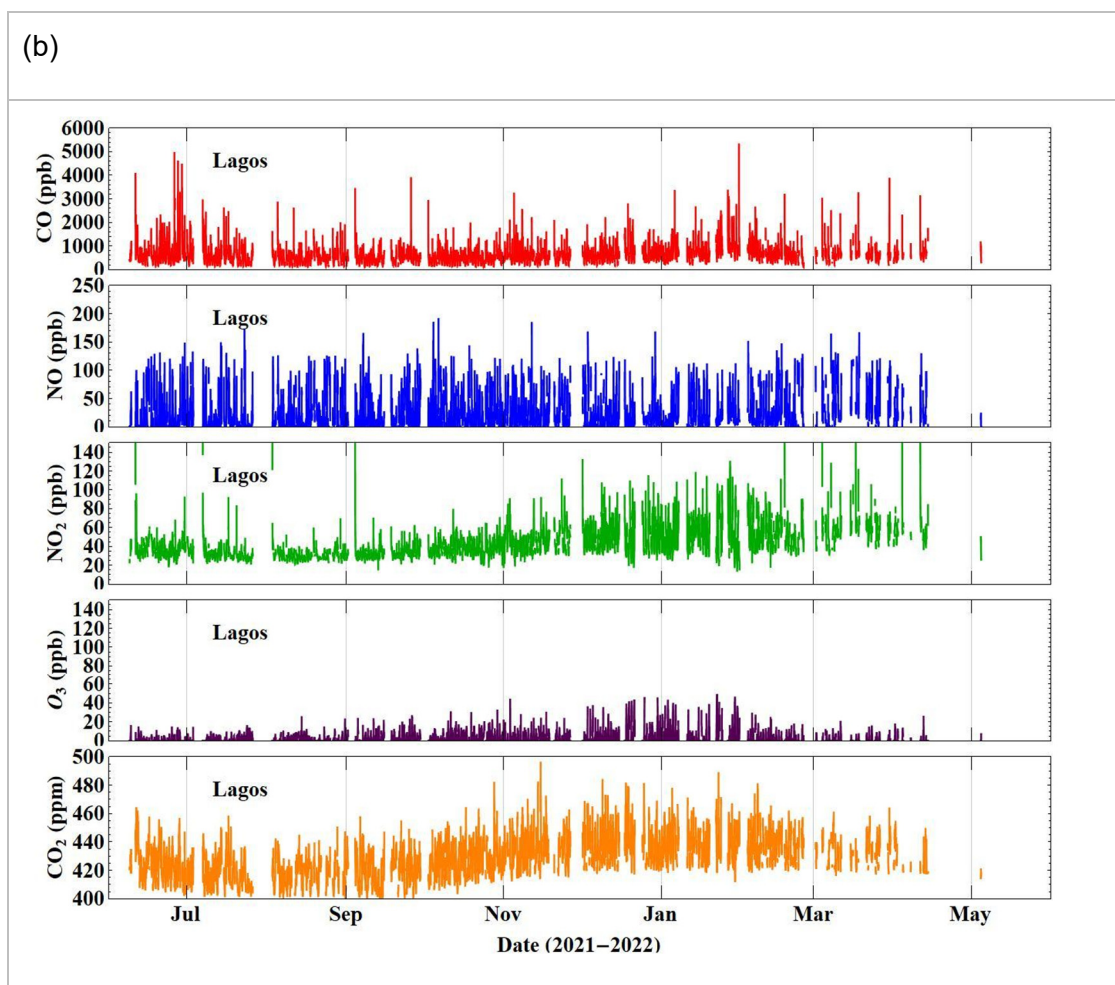

**Figure S4.** Time series of 15-minutes CO, NO, NO<sub>2</sub>, O<sub>3</sub> and CO<sub>2</sub> observation from June 2021 to May 2022. (a) MM-F, Yaoundé, Cameroon and (b) AW-VI, Lagos, Nigeria. Gaps in data are due to power outages at the sites.

(a)

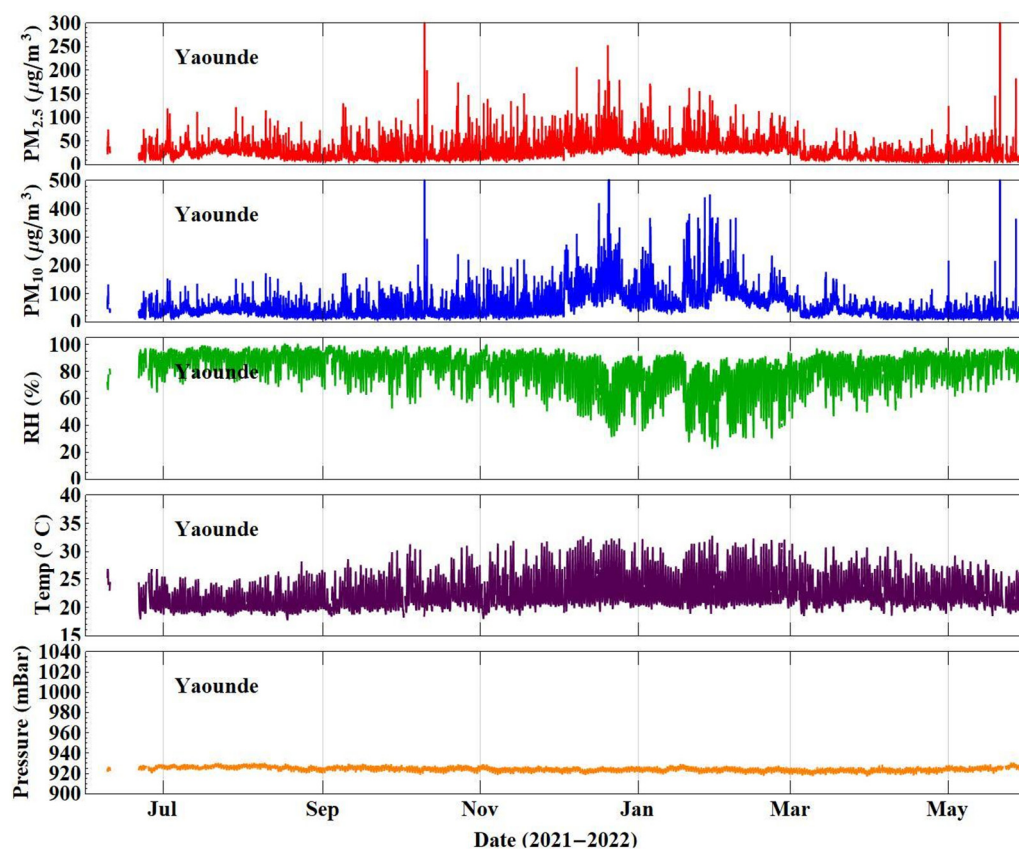



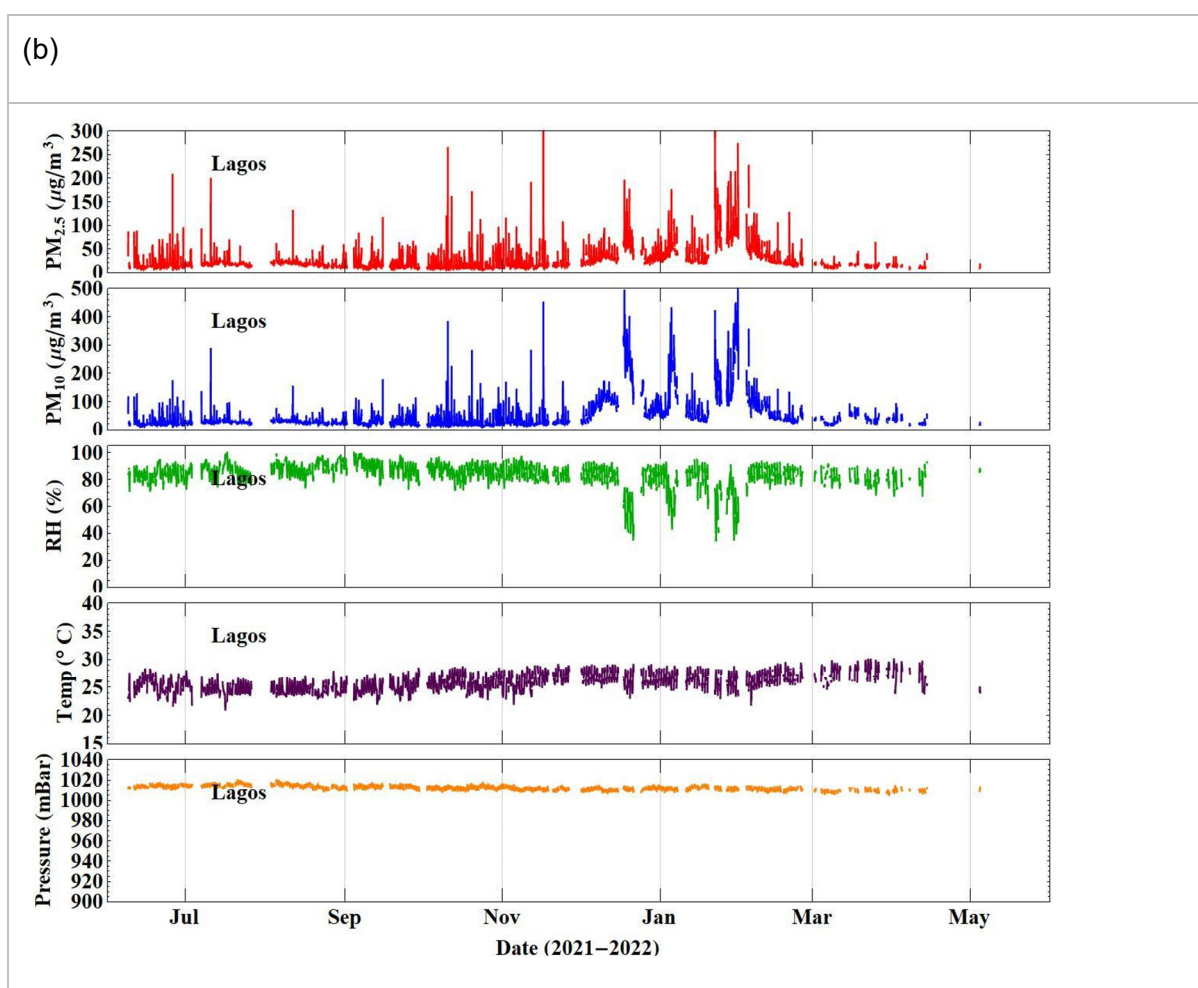

**Figure S5.** Time series of 15-minutes CO<sub>2</sub>, pressure, temperature and RH observation from May 2021 to May 2022. (a) MM-F, Yaoundé, Cameroon and (b) AW-VI, Lagos, Nigeria. Gaps in data are due to power outages at the sites.

**Table S1.** Summary statistics of measured parameters for the entire duration (May 2021 to May 2022) of the deployment at AW-VI, Lagos, Nigeria and MM-F, Yaoundé, Cameroon.

| Parameter                              | Lagos  |        |        |      |            | Yaoundé |        |        |      |            |
|----------------------------------------|--------|--------|--------|------|------------|---------|--------|--------|------|------------|
|                                        | Mean   | Max    | Min    | SD   | N data (%) | Mean    | Max    | Min    | SD   | N data (%) |
| CO (ppb)                               | 568    | 5315   | 112    | 343  | 46         | 806     | 10,600 | 118    | 851  | 95.2       |
| NO (ppb)                               | 21.0   | 193    | ‡      | 28.0 | 46         | 22.2    | 263    | ‡      | 33.0 | 95.2       |
| NO <sub>2</sub> (ppb)                  | 41.0   | 445    | 4.00   | 15.0 | 45.0       | 26.0    | 119    | ‡      | 14.0 | 95         |
| O <sub>3</sub> (ppb)                   | 3.0    | 52     | 0.00   | 6.00 | 45         | 9.00    | 88.0   | 0.00   | 11.0 | 95         |
| CO <sub>2</sub> (ppm)                  | 428    | 497    | 390    | 14.0 | 44.0       | 428     | 544    | 396    | 14.0 | 95         |
| PM <sub>2.5</sub> (μg/m <sup>3</sup> ) | 26     | 347    | 6.00   | 23.0 | 46         | 26.0    | 366    | 5.00   | 17.0 | 95.2       |
| PM <sub>10</sub> (μg/m <sup>3</sup> )  | 49.0   | 559    | 10.0   | 55.0 | 46         | 51.0    | 835    | 8.00   | 45.0 | 95.2       |
| Temp (°C)                              | 26     | 30     | 21     | 2.0  | 46         | 22.0    | 33     | 18     | 3.00 | 95.3       |
| RH (%)                                 | 84.0   | 100    | 34.0   | 8.00 | 46         | 83.0    | 100    | 23.0   | 13.0 | 95.3       |
| Pressure (mBar)                        | 1012.4 | 1020.2 | 1005.2 | 2.0  | 46         | 924.50  | 930.70 | 917.10 | 2.0  | 95.3       |

‡ Indicates value below instrument detection limit ~ 2 ppb.
